# Supplementary material for: Conductive Hydrogels with Dynamic Reversible Networks for Biomedical Applications
Source: PubMed Central journal article supplement — Adv Healthc Mater. 2021 Apr 30;10(11):2100012. doi: 10.1002/adhm.202100012 (PMC11468162; doi:10.1002/adhm.202100012), 2021-04-30
Supplement: ADHM-10-2100012-s001.pdf [file ADHM-10-2100012-s001.pdf]

# ADVANCED HEALTHCARE MATERIALS

## Supporting Information

for *Adv. Healthcare Mater.*, DOI: 10.1002/adhm.202100012

### **Conductive hydrogels with dynamic reversible network for biomedical applications**

*Yong Xu, Michelle Patino Gaillez, Rebecca Rothe, Sandra Hauser, Dagmar Voigt,  
Jens Pietzsch, and Yixin Zhang\**

## Supporting Information

## Conductive hydrogels with dynamic reversible network for biomedical applications

*Yong Xu<sup>1</sup>, Michelle Patino Gaillez<sup>1</sup>, Rebecca Rothe<sup>2,3</sup>, Sandra Hauser<sup>3</sup>, Dagmar Voigt<sup>4</sup>, Jens Pietzsch<sup>2,3</sup>, and Yixin Zhang<sup>1\*</sup>*

1 Technische Universität Dresden, B CUBE Center for Molecular Bioengineering, 01307 Dresden, Germany

2 Technische Universität Dresden, School of Science, Faculty of Chemistry and Food Chemistry, 01062 Dresden, Germany

3 Helmholtz-Zentrum Dresden-Rossendorf (HZDR), Institute of Radiopharmaceutical Cancer Research Department of Radiopharmaceutical and Chemical Biology, 01328 Dresden, Germany

4 Technische Universität Dresden, School of Science, Faculty of Biology, Institute for Botany, 01062 Dresden, Germany

### Corresponding Author

\* E-mail to [yixin.zhang1@tu-dresden.de](mailto:yixin.zhang1@tu-dresden.de)

**Table 1.** Abbreviations list

| Abbreviation |                     |
|--------------|---------------------|
| <b>2D</b>    | Two-Dimensional     |
| <b>3D</b>    | Three-Dimensional   |
| <b>AA</b>    | Acrylic Acid        |
| <b>Ad</b>    | Adamantane          |
| <b>ALD</b>   | Aldehyde Group      |
| <b>Alg</b>   | Alginate            |
| <b>AM</b>    | Acrylamide          |
| <b>AuNP</b>  | Gold Nanoparticle   |
| <b>CD</b>    | Cyclodextrins       |
| <b>CH</b>    | Conductive Hydrogel |
| <b>CHO</b>   | Aldehyde Group      |
| <b>CNT</b>   | Carbon Nanotube     |
| <b>CSH</b>   | Chitosan            |
| <b>DA</b>    | Dopamine            |

---

|                 |                                     |
|-----------------|-------------------------------------|
| <b>DBSA</b>     | Dodecylbenzenesulfonic Acid         |
| <b>DC</b>       | Direct Current                      |
| <b>DCH</b>      | Dynamic Conductive Hydrogels        |
| <b>DMSO</b>     | Dimethyl Sulfoxide                  |
| <b>DRG</b>      | Dorsal Root Ganglion                |
| <b>eCA</b>      | PEDOT:PSS In Collagen/Alginate Gels |
| <b>ECM</b>      | Extracellular Matrix                |
| <b>EDOT</b>     | 3,4-Ethylenedioxythiophene          |
| <b>EMG</b>      | Electromyography                    |
| <b>ER</b>       | Endoplasmic Reticulum               |
| <b>ES</b>       | Electrical Stimulation              |
| <b>EthD-1</b>   | Ethidium Homodimer-1                |
| <b>GAG</b>      | Glycosaminoglycan                   |
| <b>GC</b>       | Glycol Chitosan                     |
| <b>GelMA</b>    | Gelatin Methacryloyl                |
| <b>Geln</b>     | Gelatin                             |
| <b>GO</b>       | Graphene Oxide                      |
| <b>HA</b>       | Hyaluronic Acid                     |
| <b>hADSC</b>    | Human Adipose-Derived Stromal Cells |
| <b>Hep</b>      | Heparin                             |
| <b>HGF</b>      | Self-Assembling Peptide             |
| <b>HPAE</b>     | Highly Branched Poly(Amino Ester)   |
| <b>IPS Cell</b> | Induced Pluripotent Stem Cells      |
| <b>KA</b>       | Lysine-Alanine                      |
| <b>MI</b>       | Myocardial Infarction               |
| <b>MSC</b>      | Mesenchymal Stromal Cells           |
| <b>NHS</b>      | N-Hydroxysuccinimide                |
| <b>NIPAM</b>    | Nisopropylacrylamide                |
| <b>NSC</b>      | Neural Stem Cells                   |
| <b>OECTs</b>    | Organic Electrochemical Transistors |
| <b>OSA</b>      | Oxidized Sodium Alginate            |
| <b>PAA</b>      | Poly(Acrylic Acid)                  |
| <b>PAM</b>      | Polyacrylamide                      |
| <b>PANI</b>     | Polyaniline                         |
| <b>PBS</b>      | Phosphate-Buffered Saline           |
| <b>pCNTs</b>    | Pristine CNT                        |
| <b>PDA</b>      | Polydopamine                        |
| <b>PEDOT</b>    | Poly(3,4-Ethylenedioxythiophene)    |
| <b>PEG</b>      | Polyethylene Glycol                 |
| <b>PEGDA</b>    | Poly(Ethylene Glycol) Diacrylate    |
| <b>PPGS</b>     | PEDOT:PSS/Guar Slime                |
| <b>PPy</b>      | Polypyrrole                         |
| <b>PSS</b>      | Polystyrene Sulfonate               |
| <b>PVA</b>      | Polyvinyl Alcohol                   |
| <b>QRS</b>      | Electrocardiogram Curves            |

---

---

|              |                             |
|--------------|-----------------------------|
| <b>rGO</b>   | Reduced GO                  |
| <b>RT</b>    | Room Temperature-Formed     |
| <b>S-Alg</b> | Sulfated Alginate           |
| <b>SC</b>    | Schwann Cell                |
| <b>SCI</b>   | Spinal Cord Injury          |
| <b>SD</b>    | Standard Deviation          |
| <b>SWCNT</b> | Single-Walled CNT           |
| <b>TA</b>    | Tannic Acid                 |
| <b>UPy</b>   | 2-Ureido-4[1H]-Pyrimidinone |

---
